# Supplementary material for: Flagellar membranes are rich in raft-forming phospholipids
Source: PubMed Central journal article supplement (PMC4582118; doi:10.1242/bio.011957), 2015-08-14
Supplement: supp_bio.011957_BIO011957supp.pdf [file supp_bio.011957_BIO011957supp.pdf]

**Supplementary Information:**

Tables S1 – S8: Lipid molecular species identified in positive and negative ionisation modes. \* d stands for diacyl-type, e for ether-type molecular species. Amounts are calculated relative to the most intense molecular species. C: number of carbon atoms in fatty acyl chains; DB: number of double bonds.

Table S1: PC, positive ionisation mode

| Input Mass | Matched Mass | $\Delta$ | type* | C  | DB | Species         | Ion                | % Flagella | % Whole cells |
|------------|--------------|----------|-------|----|----|-----------------|--------------------|------------|---------------|
| 772.6217   | 772.6215     | 0.0002   | e     | 36 | 2  | PC(O-18:0/18:2) | [M+H] <sup>+</sup> | 100        | 100           |
| 770.6064   | 770.6058     | 0.0006   | e     | 36 | 2  | PC(P-18:0/18:2) | [M+H] <sup>+</sup> | 49         | 32            |
| 834.6001   | 834.6008     | 0.0007   | d     | 40 | 6  | PC(18:0/22:6)   | [M+H] <sup>+</sup> | 31         | 43            |
| 786.6010   | 786.6008     | 0.0002   | d     | 36 | 2  | PC(36:2)        | [M+H] <sup>+</sup> | 22         | 34            |
| 836.6149   | 836.6165     | 0.0016   | d     | 40 | 5  | PC(40:5)        | [M+H] <sup>+</sup> | 20         | 31            |
| 830.5697   | 830.5695     | 0.0002   | d     | 40 | 8  | PC(18:2/22:6)   | [M+H] <sup>+</sup> | 17         | 36            |
| 788.6161   | 788.6164     | 0.0003   | d     | 36 | 1  | PC(18:0/18:1)   | [M+H] <sup>+</sup> | 18         | 18            |
| 784.5855   | 784.5851     | 0.0004   | d     | 36 | 3  | PC(18:1/18:2)   | [M+H] <sup>+</sup> | 15         | 25            |
| 832.5842   | 832.5852     | 0.0010   | d     | 40 | 7  | PC(18:2/22:5)   | [M+H] <sup>+</sup> | 14         | 33            |
| 838.6316   | 838.6321     | 0.0005   | d     | 40 | 4  | PC(40:4)        | [M+H] <sup>+</sup> | 8          | 12            |
| 812.6163   | 812.6164     | 0.0001   | d     | 38 | 3  | PC(38:3)        | [M+H] <sup>+</sup> | 7          | 11            |
| 810.6009   | 810.6008     | 0.0001   | d     | 38 | 4  | PC(38:4)        | [M+H] <sup>+</sup> | 7          | 11            |
| 742.5749   | 742.5745     | 0.0004   | e     | 34 | 2  | PC(e34:2)       | [M+H] <sup>+</sup> | 7          | 4             |
| 840.6470   | 840.6477     | 0.0007   | d     | 40 | 3  | PC(40:3)        | [M+H] <sup>+</sup> | 7          | 10            |
| 808.5854   | 808.5852     | 0.0002   | d     | 38 | 5  | PC(38:5)        | [M+H] <sup>+</sup> | 5          | 7             |
| 814.6318   | 814.6321     | 0.0003   | d     | 38 | 2  | PC(38:2)        | [M+H] <sup>+</sup> | 5          | 7             |
| 774.6375   | 774.6371     | 0.0004   | e     | 36 | 1  | PC(e36:1)       | [M+H] <sup>+</sup> | 5          | 6             |
| 806.5696   | 806.5695     | 0.0001   | d     | 38 | 6  | PC(38:6)        | [M+H] <sup>+</sup> | 4          | 11            |
| 782.5697   | 782.5695     | 0.0002   | d     | 36 | 4  | PC(18:2/18:2)   | [M+H] <sup>+</sup> | 4          | 11            |
| 760.5853   | 760.5851     | 0.0002   | d     | 34 | 1  | PC(16:0/18:1)   | [M+H] <sup>+</sup> | 4          | 7             |
| 744.5907   | 744.5902     | 0.0005   | e     | 34 | 1  | PC(e34:1)       | [M+H] <sup>+</sup> | 4          | 4             |
| 758.5699   | 758.5695     | 0.0004   | d     | 34 | 2  | PC(16:1/18:1)   | [M+H] <sup>+</sup> | 3          | 6             |
| 798.6370   | 798.6371     | 0.0001   | e     | 38 | 3  | PC(e38:3)       | [M+H] <sup>+</sup> | 3          | 3             |
| 880.5861   | 880.5852     | 0.0009   | d     | 44 | 11 | PC(44:11)       | [M+H] <sup>+</sup> | 3          | 9             |
| 794.6030   | 794.6058     | 0.0028   | e     | 38 | 4  | PC(e38:4)       | [M+H] <sup>+</sup> | 4          | 3             |
| 800.6530   | 800.6528     | 0.0002   | e     | 38 | 2  | PC(e38:2)       | [M+H] <sup>+</sup> | 3          | 4             |
| 878.5697   | 878.5695     | 0.0002   | d     | 44 | 12 | PC(44:12)       | [M+H] <sup>+</sup> | 3          | 7             |
| 856.5848   | 856.5851     | 0.0003   | d     | 42 | 9  | PC(42:9)        | [M+H] <sup>+</sup> | 3          | 3             |
| 860.6161   | 860.6164     | 0.0003   | d     | 42 | 7  | PC(42:7)        | [M+H] <sup>+</sup> | 2          | 4             |
| 858.6005   | 858.6008     | 0.0003   | d     | 42 | 8  | PC(42:8)        | [M+H] <sup>+</sup> | 2          | 4             |
| 768.5905   | 768.5902     | 0.0003   | e     | 36 | 4  | PC(e36:4)       | [M+H] <sup>+</sup> | 2          | 2             |
| 816.6480   | 816.6477     | 0.0003   | d     | 38 | 1  | PC(38:1)        | [M+H] <sup>+</sup> | 2          | 2             |
| 862.6316   | 862.6321     | 0.0005   | d     | 42 | 6  | PC(42:6)        | [M+H] <sup>+</sup> | 2          | 3             |

|          |          |        |   |    |    |           |                    |    |    |
|----------|----------|--------|---|----|----|-----------|--------------------|----|----|
| 854.5691 | 854.5695 | 0.0004 | d | 42 | 10 | PC(42:10) | [M+H] <sup>+</sup> | 2  | 4  |
| 804.5543 | 804.5538 | 0.0005 | d | 38 | 7  | PC(38:7)  | [M+H] <sup>+</sup> | 1  | 3  |
| 884.6160 | 884.6165 | 0.0005 | d | 44 | 9  | PC(44:9)  | [M+H] <sup>+</sup> | 1  | 2  |
| 882.6024 | 882.6008 | 0.0016 | d | 44 | 10 | PC(44:10) | [M+H] <sup>+</sup> | 1  | 3  |
| 796.6213 | 796.6215 | 0.0002 | e | 38 | 4  | PC(e38:4) | [M+H] <sup>+</sup> | 1  | 1  |
| 716.5596 | 716.5589 | 0.0007 | e | 32 | 2  | PC(e32:2) | [M+H] <sup>+</sup> | 1  | <1 |
| 756.5542 | 756.5538 | 0.0004 | d | 34 | 3  | PC(34:3)  | [M+H] <sup>+</sup> | 1  | 2  |
| 746.6067 | 746.6058 | 0.0009 | e | 34 | 1  | PC(e34:1) | [M+H] <sup>+</sup> | 1  | 1  |
| 778.5385 | 778.5382 | 0.0003 | d | 36 | 6  | PC(36:6)  | [M+H] <sup>+</sup> | 1  | 1  |
| 864.6470 | 864.6477 | 0.0007 | d | 42 | 5  | PC(42:5)  | [M+H] <sup>+</sup> | 1  | 1  |
| 780.5543 | 780.5538 | 0.0005 | d | 36 | 5  | PC(36:5)  | [M+H] <sup>+</sup> | 1  | 1  |
| 886.6319 | 886.6321 | 0.0002 | d | 44 | 8  | PC(44:8)  | [M+H] <sup>+</sup> | 1  | 1  |
| 732.5541 | 732.5538 | 0.0003 | d | 32 | 1  | PC(32:1)  | [M+H] <sup>+</sup> | 1  | 1  |
| 852.5536 | 852.5538 | 0.0002 | d | 42 | 11 | PC(42:11) | [M+H] <sup>+</sup> | 1  | 1  |
| 790.6327 | 790.6321 | 0.0006 | d | 36 | 0  | PC(36:0)  | [M+H] <sup>+</sup> | 1  | 1  |
| 762.6018 | 762.6008 | 0.0010 | d | 34 | 0  | PC(34:0)  | [M+H] <sup>+</sup> | 1  | 1  |
| 730.5384 | 730.5382 | 0.0002 | d | 32 | 2  | PC(32:2)  | [M+H] <sup>+</sup> | 1  | 1  |
| 802.5384 | 802.5382 | 0.0002 | d | 38 | 8  | PC(38:8)  | [M+H] <sup>+</sup> | <1 | 2  |
| 842.6639 | 842.6633 | 0.0006 | d | 40 | 2  | PC(40:2)  | [M+H] <sup>+</sup> | <1 | 1  |
| 734.5700 | 734.5695 | 0.0005 | d | 32 | 0  | PC(32:0)  | [M+H] <sup>+</sup> | <1 | 1  |
| 820.6222 | 820.6215 | 0.0007 | e | 40 | 6  | PC(e40:6) | [M+H] <sup>+</sup> | <1 | <1 |
| 866.6637 | 866.6634 | 0.0003 | d | 42 | 4  | PC(42:4)  | [M+H] <sup>+</sup> | <1 | 1  |
| 718.5752 | 718.5745 | 0.0007 | e | 32 | 1  | PC(e32:1) | [M+H] <sup>+</sup> | <1 | <1 |
| 754.5384 | 754.5382 | 0.0002 | d | 34 | 4  | PC(34:4)  | [M+H] <sup>+</sup> | <1 | 1  |
| 828.5537 | 828.5538 | 0.0001 | d | 40 | 9  | PC(40:9)  | [M+H] <sup>+</sup> | <1 | 1  |
| 888.6479 | 888.6478 | 0.0001 | d | 44 | 7  | PC(44:7)  | [M+H] <sup>+</sup> | <1 | <1 |
| 844.6795 | 844.6790 | 0.0005 | d | 40 | 1  | PC(40:1)  | [M+H] <sup>+</sup> | <1 | <1 |
| 766.5741 | 766.5745 | 0.0004 | e | 36 | 5  | PC(e36:5) | [M+H] <sup>+</sup> | <1 | <1 |
| 764.5578 | 764.5589 | 0.0011 | e | 36 | 6  | PC(36:6)  | [M+H] <sup>+</sup> | <1 | <1 |
| 890.6636 | 890.6634 | 0.0002 | d | 44 | 6  | PC(44:6)  | [M+H] <sup>+</sup> | <1 | <1 |
| 822.6373 | 822.6371 | 0.0002 | e | 40 | 5  | PC(40:5)  | [M+H] <sup>+</sup> | <1 | <1 |
| 868.6793 | 868.6790 | 0.0003 | d | 42 | 3  | PC(42:3)  | [M+H] <sup>+</sup> | <1 | <1 |
| 706.5383 | 706.5382 | 0.0001 | d | 30 | 0  | PC(30:0)  | [M+H] <sup>+</sup> | <1 | <1 |
| 728.5232 | 728.5225 | 0.0007 | d | 32 | 3  | PC(32:3)  | [M+H] <sup>+</sup> | <1 | <1 |
| 826.5373 | 826.5382 | 0.0009 | d | 40 | 10 | PC(40:10) | [M+H] <sup>+</sup> | <1 | <1 |
| 824.6536 | 824.6528 | 0.0008 | e | 40 | 4  | PC(e40:4) | [M+H] <sup>+</sup> | <1 | <1 |
| 826.6686 | 826.6684 | 0.0002 | e | 40 | 3  | PC(e40:3) | [M+H] <sup>+</sup> | <1 | <1 |
| 704.5226 | 704.5225 | 0.0001 | d | 30 | 1  | PC(30:1)  | [M+H] <sup>+</sup> | <1 | <1 |
| 848.6529 | 848.6528 | 0.0001 | e | 42 | 6  | PC(e42:6) | [M+H] <sup>+</sup> | <1 | <1 |
| 750.5073 | 750.5069 | 0.0004 | d | 34 | 6  | PC(34:6)  | [M+H] <sup>+</sup> | <1 | <1 |
| 702.5069 | 702.5069 | 0.0000 | d | 30 | 2  | PC(30:2)  | [M+H] <sup>+</sup> | <1 | <1 |
| 776.5226 | 776.5225 | 0.0001 | d | 36 | 7  | PC(36:7)  | [M+H] <sup>+</sup> | <1 | <1 |
| 892.6799 | 892.679  | 0.0009 | d | 44 | 5  | PC(44:5)  | [M+H] <sup>+</sup> | <1 | <1 |
| 870.6958 | 870.6947 | 0.0011 | d | 42 | 2  | PC(42:2)  | [M+H] <sup>+</sup> | <1 | <1 |

## PC, negative ionisation mode

| Input<br>Mass | Matched<br>Mass | $\Delta$ | type* | C  | DB | Species         | Ion          | %<br>Flagella | %<br>Whole cells |
|---------------|-----------------|----------|-------|----|----|-----------------|--------------|---------------|------------------|
| 816.6114      | 816.6119        | 0.0005   | e     | 36 | 2  | PC(O-18:0/18:2) | [M+Formate]- | 100           | 100              |
| 814.5963      | 814.5963        | 0.0000   | e     | 36 | 2  | PC(P-18:0/18:2) | [M+Formate]- | 56            | 38               |
| 878.5909      | 878.5912        | 0.0003   | d     | 40 | 6  | PC(18:0/22:6)   | [M+Formate]- | 39            | 58               |
| 876.5749      | 876.5755        | 0.0006   | d     | 40 | 7  | PC(18:2/22:5)   | [M+Formate]- | 34            | 60               |
| 874.5593      | 874.5599        | 0.0006   | d     | 40 | 8  | PC(18:2/22:6)   | [M+Formate]- | 32            | 57               |
| 830.5909      | 830.5911        | 0.0002   | d     | 36 | 2  | PC(36:2)        | [M+Formate]- | 29            | 39               |
| 828.5755      | 828.5755        | 0.0000   | d     | 36 | 3  | PC(18:1/18:2)   | [M+Formate]- | 24            | 37               |
| 802.5602      | 802.5599        | 0.0003   | d     | 34 | 2  | PC(16:1/18:1)   | [M+Formate]- | 23            | 18               |
| 880.6063      | 880.6068        | 0.0005   | d     | 40 | 5  | PC(40:5)        | [M+Formate]- | 23            | 32               |
| 832.6059      | 832.6068        | 0.0009   | d     | 36 | 1  | PC(18:0/18:1)   | [M+Formate]- | 18            | 18               |
| 850.5603      | 850.5599        | 0.0004   | d     | 38 | 6  | PC(38:6)        | [M+Formate]- | 10            | 19               |
| 826.5601      | 826.5603        | 0.0002   | d     | 36 | 4  | PC(18:2/18:2)   | [M+Formate]- | 10            | 20               |
| 852.5761      | 852.5755        | 0.0006   | d     | 38 | 5  | PC(38:5)        | [M+Formate]- | 9             | 17               |
| 856.6065      | 856.6068        | 0.0003   | d     | 38 | 3  | PC(38:3)        | [M+Formate]- | 9             | 13               |
| 854.5913      | 854.5912        | 0.0001   | d     | 38 | 4  | PC(38:4)        | [M+Formate]- | 8             | 14               |
| 804.5751      | 804.5755        | 0.0004   | d     | 34 | 1  | PC(16:0/18:1)   | [M+Formate]- | 8             | 9                |
| 882.6217      | 882.6225        | 0.0008   | d     | 40 | 4  | PC(40:4)        | [M+Formate]- | 8             | 11               |
| 922.5591      | 922.5599        | 0.0008   | d     | 44 | 12 | PC(44:12)       | [M+Formate]- | 7             | 11               |
| 884.6380      | 884.6381        | 0.0001   | d     | 40 | 3  | PC(40:3)        | [M+Formate]- | 7             | 7                |
| 818.6281      | 818.6276        | 0.0005   | e     | 36 | 0  | PC(e36:0)       | [M+Formate]- | 7             | 5                |
| 788.5807      | 788.5811        | 0.0004   | e     | 34 | 1  | PC(e34:1)       | [M+Formate]- | 7             | 6                |
| 844.6434      | 844.6432        | 0.0002   | e     | 38 | 2  | PC(e38:2)       | [M+Formate]- | 6             | 4                |
| 924.5751      | 924.5756        | 0.0005   | d     | 44 | 11 | PC(44:11)       | [M+Formate]- | 6             | 10               |
| 858.6223      | 858.6225        | 0.0002   | d     | 38 | 2  | PC(38:2)        | [M+Formate]- | 5             | 6                |
| 900.5754      | 900.5755        | 0.0001   | d     | 42 | 9  | PC(42:9)        | [M+Formate]- | 4             | 8                |
| 798.5281      | 798.5286        | 0.0005   | d     | 34 | 4  | PC(34:4)        | [M+Formate]- | 4             | 3                |
| 844.6062      | 844.6068        | 0.0006   | d     | 37 | 2  | PC(37:2)        | [M+Formate]- | 3             | 2                |
| 902.5908      | 902.5912        | 0.0004   | d     | 42 | 8  | PC(42:8)        | [M+Formate]- | 3             | 6                |
| 898.5592      | 898.5599        | 0.0007   | d     | 42 | 10 | PC(42:10)       | [M+Formate]- | 3             | 6                |
| 848.5444      | 848.5442        | 0.0002   | d     | 38 | 7  | PC(38:7)        | [M+Formate]- | 3             | 5                |
| 822.5265      | 822.5286        | 0.0021   | d     | 36 | 6  | PC(36:6)        | [M+Formate]- | 3             | 2                |
| 926.5906      | 926.5912        | 0.0006   | d     | 44 | 10 | PC(44:10)       | [M+Formate]- | 3             | 4                |
| 904.6063      | 904.6068        | 0.0005   | d     | 42 | 7  | PC(42:7)        | [M+Formate]- | 2             | 4                |
| 928.6063      | 928.6069        | 0.0006   | d     | 44 | 9  | PC(44:9)        | [M+Formate]- | 2             | 3                |
| 906.6218      | 906.6225        | 0.0007   | d     | 42 | 6  | PC(42:6)        | [M+Formate]- | 2             | 3                |
| 846.6224      | 846.6225        | 0.0001   | d     | 37 | 1  | PC(37:1)        | [M+Formate]- | 1             | 1                |
| 824.5433      | 824.5442        | 0.0009   | d     | 36 | 5  | PC(36:5)        | [M+Formate]- | 1             | 2                |
| 886.6541      | 886.6538        | 0.0003   | d     | 40 | 2  | PC(40:2)        | [M+Formate]- | 1             | 1                |
| 776.5443      | 776.5442        | 0.0001   | d     | 32 | 1  | PC(32:1)        | [M+Formate]- | 1             | 1                |
| 908.6387      | 908.6382        | 0.0005   | d     | 42 | 5  | PC(42:5)        | [M+Formate]- | 1             | 1                |
| 888.6697      | 888.6694        | 0.0003   | d     | 40 | 1  | PC(40:1)        | [M+Formate]- | <1            | <1               |
| 790.5966      | 790.5967        | 0.0001   | e     | 36 | 1  | PC(O-16:0/18:1) | [M+Formate]- | <1            | <1               |
| 910.6540      | 910.6538        | 0.0002   | d     | 42 | 4  | PC(42:4)        | [M+Formate]- | <1            | <1               |

Table S2: PE, positive ionisation mode

| Input<br>Mass | Matched<br>Mass | $\Delta$ | type* | C  | DB | Species                       | Ion                | %<br>Flagella | %<br>Whole cells |
|---------------|-----------------|----------|-------|----|----|-------------------------------|--------------------|---------------|------------------|
| 730.5750      | 730.5745        | 0.0005   | e     | 36 | 2  | PE(O-18:0/18:2);(P-18:0/18:1) | [M+H] <sup>+</sup> | 100           | 83               |
| 728.5594      | 728.5589        | 0.0005   | e     | 36 | 2  | PE(P-18:0/18:2)               | [M+H] <sup>+</sup> | 99            | 100              |
| 732.5904      | 732.5902        | 0.0002   | e     | 36 | 1  | PE(O-18:0/18:1)               | [M+H] <sup>+</sup> | 32            | 26               |
| 758.6066      | 758.6058        | 0.0008   | e     | 38 | 1  | PE(O-20:0/18:2);(P-20:0/18:1) | [M+H] <sup>+</sup> | 16            | 26               |
| 756.5909      | 756.5902        | 0.0007   | e     | 38 | 3  | PE(P-20:0/18:2)               | [M+H] <sup>+</sup> | 16            | 17               |
| 744.5544      | 744.5538        | 0.0006   | d     | 36 | 2  | PE(36:2)                      | [M+H] <sup>+</sup> | 6             | 10               |
| 786.6371      | 786.6371        | 0.0000   | e     | 40 | 2  | PE(e40:2)                     | [M+H] <sup>+</sup> | 5             | 13               |
| 772.5856      | 772.5851        | 0.0005   | d     | 38 | 2  | PE(38:2)                      | [M+H] <sup>+</sup> | 4             | 13               |
| 714.5437      | 714.5432        | 0.0005   | e     | 35 | 3  | PE(e35:3)                     | [M+H] <sup>+</sup> | 4             | 4                |
| 746.5701      | 746.5695        | 0.0006   | d     | 36 | 1  | PE(36:1)                      | [M+H] <sup>+</sup> | 4             | 6                |
| 798.6011      | 798.6008        | 0.0003   | d     | 40 | 3  | PE(40:3)                      | [M+H] <sup>+</sup> | 4             | 15               |
| 800.6157      | 800.6164        | 0.0007   | d     | 40 | 2  | PE(40:2)                      | [M+H] <sup>+</sup> | 4             | 10               |
| 752.5574      | 752.5589        | 0.0015   | e     | 38 | 5  | PE(e38:5)                     | [M+H] <sup>+</sup> | 3             | 2                |
| 784.6214      | 784.6215        | 0.0001   | e     | 40 | 3  | PE(e40:3)                     | [M+H] <sup>+</sup> | 3             | 5                |
| 820.5857      | 820.5852        | 0.0005   | d     | 42 | 6  | PE(42:6)                      | [M+H] <sup>+</sup> | 3             | 11               |
| 774.6006      | 774.6008        | 0.0002   | d     | 38 | 1  | PE(38:1)                      | [M+H] <sup>+</sup> | 3             | 7                |
| 750.5410      | 750.5432        | 0.0022   | e     | 38 | 6  | PE(e38:6)                     | [M+H] <sup>+</sup> | 3             | 2                |
| 822.6014      | 822.6008        | 0.0006   | d     | 42 | 5  | PE(42:5)                      | [M+H] <sup>+</sup> | 2             | 9                |
| 760.6213      | 760.6215        | 0.0002   | e     | 38 | 1  | PE(e38:1)                     | [M+H] <sup>+</sup> | 2             | 3                |
| 726.5430      | 726.5432        | 0.0002   | e     | 36 | 4  | PE(e36:4)                     | [M+H] <sup>+</sup> | 2             | 2                |
| 754.5746      | 754.5745        | 0.0001   | e     | 38 | 4  | PE(e38:4)                     | [M+H] <sup>+</sup> | 2             | 2                |
| 802.6321      | 802.6321        | 0.0000   | d     | 40 | 1  | PE(40:1)                      | [M+H] <sup>+</sup> | 2             | 6                |
| 700.5279      | 700.5276        | 0.0003   | e     | 34 | 3  | PE(e34:3)                     | [M+H] <sup>+</sup> | 2             | 2                |
| 702.5437      | 702.5432        | 0.0005   | e     | 34 | 2  | PE(e34:2)                     | [M+H] <sup>+</sup> | 2             | 1                |
| 792.5542      | 792.5539        | 0.0003   | d     | 40 | 6  | PE(40:6)                      | [M+H] <sup>+</sup> | 2             | 4                |
| 770.5697      | 770.5695        | 0.0002   | d     | 38 | 3  | PE(38:3)                      | [M+H] <sup>+</sup> | 2             | 7                |
| 796.5854      | 796.5851        | 0.0003   | d     | 40 | 4  | PE(40:4)                      | [M+H] <sup>+</sup> | 1             | 6                |
| 824.6170      | 824.6164        | 0.0006   | d     | 42 | 4  | PE(42:4)                      | [M+H] <sup>+</sup> | 1             | 6                |
| 826.6322      | 826.6321        | 0.0001   | d     | 42 | 3  | PE(42:3)                      | [M+H] <sup>+</sup> | 1             | 4                |
| 794.5693      | 794.5695        | 0.0002   | d     | 40 | 5  | PE(40:5)                      | [M+H] <sup>+</sup> | 1             | 4                |
| 818.5702      | 818.5695        | 0.0007   | d     | 42 | 7  | PE(42:7)                      | [M+H] <sup>+</sup> | 1             | 6                |
| 846.6004      | 846.6008        | 0.0004   | d     | 44 | 7  | PE(44:7)                      | [M+H] <sup>+</sup> | 1             | 5                |
| 742.5386      | 742.5382        | 0.0004   | d     | 36 | 3  | PE(36:3)                      | [M+H] <sup>+</sup> | 1             | 4                |
| 848.6161      | 848.6164        | 0.0003   | d     | 44 | 6  | PE(44:6)                      | [M+H] <sup>+</sup> | 1             | 4                |
| 768.5541      | 768.5538        | 0.0003   | d     | 38 | 4  | PE(38:4)                      | [M+H] <sup>+</sup> | 1             | 3                |
| 718.5387      | 718.5382        | 0.0005   | d     | 34 | 1  | PE(34:1)                      | [M+H] <sup>+</sup> | 1             | 1                |
| 724.5279      | 724.5276        | 0.0003   | e     | 36 | 5  | PE(e36:5)                     | [M+H] <sup>+</sup> | 1             | 4                |
| 740.5229      | 740.5225        | 0.0004   | d     | 36 | 4  | PE(36:4)                      | [M+H] <sup>+</sup> | 1             | 2                |
| 828.6481      | 828.6477        | 0.0004   | d     | 42 | 2  | PE(42:2)                      | [M+H] <sup>+</sup> | 1             | 2                |
| 850.6322      | 850.6321        | 0.0001   | d     | 44 | 5  | PE(44:5)                      | [M+H] <sup>+</sup> | 1             | 2                |
| 816.5543      | 816.5539        | 0.0004   | d     | 42 | 8  | PE(42:8)                      | [M+H] <sup>+</sup> | 1             | 4                |
| 788.5231      | 788.5226        | 0.0005   | d     | 40 | 8  | PE(40:8)                      | [M+H] <sup>+</sup> | <1            | 1                |

|          |          |        |   |    |   |           |                    |    |    |
|----------|----------|--------|---|----|---|-----------|--------------------|----|----|
| 780.5881 | 780.5902 | 0.0021 | e | 40 | 5 | PE(e40:5) | [M+H] <sup>+</sup> | <1 | <1 |
| 790.5387 | 790.5382 | 0.0005 | d | 40 | 7 | PE(40:7)  | [M+H] <sup>+</sup> | <1 | 2  |
| 716.5225 | 716.5225 | 0.0000 | d | 34 | 2 | PE(34:2)  | [M+H] <sup>+</sup> | <1 | 1  |
| 766.5383 | 766.5382 | 0.0001 | d | 38 | 5 | PE(38:5)  | [M+H] <sup>+</sup> | <1 | 1  |
| 852.6478 | 852.6477 | 0.0001 | d | 44 | 4 | PE(44:4)  | [M+H] <sup>+</sup> | <1 | 1  |
| 844.5846 | 844.5851 | 0.0005 | d | 44 | 8 | PE(44:8)  | [M+H] <sup>+</sup> | <1 | 2  |
| 764.5229 | 764.5225 | 0.0004 | d | 38 | 6 | PE(38:6)  | [M+H] <sup>+</sup> | <1 | 1  |
| 854.6632 | 854.6634 | 0.0002 | d | 44 | 3 | PE(44:3)  | [M+H] <sup>+</sup> | <1 | <1 |
| 688.4914 | 688.4912 | 0.0002 | d | 32 | 2 | PE(32:2)  | [M+H] <sup>+</sup> | <1 | <1 |
| 714.5075 | 714.5069 | 0.0006 | d | 34 | 3 | PE(34:3)  | [M+H] <sup>+</sup> | <1 | <1 |
| 690.5073 | 690.5069 | 0.0004 | d | 32 | 1 | PE(32:1)  | [M+H] <sup>+</sup> | <1 | <1 |
| 842.5688 | 842.5695 | 0.0007 | d | 44 | 9 | PE(44:9)  | [M+H] <sup>+</sup> | <1 | <1 |
| 762.5070 | 762.5069 | 0.0001 | d | 38 | 7 | PE(38:7)  | [M+H] <sup>+</sup> | <1 | <1 |
| 712.4917 | 712.4912 | 0.0005 | d | 34 | 4 | PE(34:4)  | [M+H] <sup>+</sup> | <1 | <1 |

Table S2: PE, negative ionisation mode

| Input Mass | Matched Mass | $\Delta$ | type* | C  | DB | Species                         | Ion                | % Flagella | % Whole cells |
|------------|--------------|----------|-------|----|----|---------------------------------|--------------------|------------|---------------|
| 726.5431   | 726.5443     | 0.0012   | e     | 36 | 2  | PE(P-18:0/18:2)                 | [M-H] <sup>-</sup> | 100        | 100           |
| 728.5587   | 728.5599     | 0.0012   | e     | 36 | 1  | PE(O-18:0/18:2);PE(P-18:0/18:1) | [M-H] <sup>-</sup> | 69         | 66            |
| 730.5752   | 730.5756     | 0.0004   | e     | 36 | 1  | PE(O-18:0/18:1)                 | [M-H] <sup>-</sup> | 16         | 15            |
| 754.5749   | 754.5756     | 0.0007   | e     | 38 | 3  | PE(P-20:0/18:2)                 | [M-H] <sup>-</sup> | 8          | 9             |
| 756.5910   | 756.5912     | 0.0002   | e     | 38 | 2  | PE(O-20:0/18:2);(P-20:0/18:1)   | [M-H] <sup>-</sup> | 7          | 6             |
| 742.5385   | 742.5392     | 0.0007   | d     | 36 | 2  | PE(18:0/18:2);PE(18:1/18:1)     | [M-H] <sup>-</sup> | 4          | 8             |
| 744.5538   | 744.5549     | 0.0011   | d     | 36 | 1  | PE(18:0/18:1)                   | [M-H] <sup>-</sup> | 3          | 5             |
| 712.5282   | 712.5286     | 0.0004   | e     | 35 | 2  | PE(P-18:0/17:2)                 | [M-H] <sup>-</sup> | 3          | 3             |
| 698.5124   | 698.5130     | 0.0006   | e     | 34 | 3  | PE(P-16:1/18:2)                 | [M-H] <sup>-</sup> | 3          | 2             |
| 768.5547   | 768.5549     | 0.0002   | d     | 38 | 3  | PE(38:3)                        | [M-H] <sup>-</sup> | 2          | 2             |
| 758.6068   | 758.6069     | 0.0001   | e     | 38 | 1  | PE(O-20:0/18:1)                 | [M-H] <sup>-</sup> | 2          | 1             |
| 724.5281   | 724.5286     | 0.0005   | e     | 36 | 3  | PE(e36:3)                       | [M-H] <sup>-</sup> | 2          | 2             |
| 714.5441   | 714.5443     | 0.0002   | e     | 35 | 1  | PE(P-18:0/17:1)                 | [M-H] <sup>-</sup> | 2          | 2             |
| 740.5232   | 740.5236     | 0.0004   | d     | 36 | 3  | PE(18:1/18:2)                   | [M-H] <sup>-</sup> | 2          | 5             |
| 770.5705   | 770.5705     | 0.0000   | d     | 38 | 2  | PE(18:0/20:2);PE(18:1/20:1)     | [M-H] <sup>-</sup> | 2          | 2             |
| 700.5282   | 700.5286     | 0.0004   | e     | 34 | 1  | PE(P-16:0/18:1)                 | [M-H] <sup>-</sup> | 2          | 1             |
| 790.5388   | 790.5392     | 0.0004   | d     | 40 | 6  | PE(18:0/22:6)                   | [M-H] <sup>-</sup> | 1          | 3             |
| 752.5590   | 752.5599     | 0.0009   | e     | 38 | 4  | PE(P-20:1/18:2)                 | [M-H] <sup>-</sup> | 1          | 1             |
| 788.5237   | 788.5236     | 0.0001   | d     | 40 | 7  | PE(18:2/22:5);PE(18:1/22:6)     | [M-H] <sup>-</sup> | 1          | 2             |
| 792.5542   | 792.5549     | 0.0007   | d     | 40 | 5  | PE(18:0/22:5)                   | [M-H] <sup>-</sup> | 1          | 2             |
| 716.5231   | 716.5236     | 0.0005   | d     | 34 | 1  | PE(16:0/18:1)                   | [M-H] <sup>-</sup> | 1          | 1             |
| 738.5072   | 738.5079     | 0.0007   | d     | 36 | 4  | PE(18:2/18:2)                   | [M-H] <sup>-</sup> | 1          | 3             |
| 796.5855   | 796.5862     | 0.0007   | d     | 40 | 3  | PE(40:3)                        | [M-H] <sup>-</sup> | 1          | 1             |
| 714.5076   | 714.5079     | 0.0003   | d     | 34 | 2  | PE(16:0/18:2)                   | [M-H] <sup>-</sup> | 1          | 1             |
| 786.5070   | 786.5079     | 0.0009   | d     | 40 | 8  | PE(40:8)                        | [M-H] <sup>-</sup> | <1         | 2             |

|          |          |        |   |    |   |           |        |    |    |
|----------|----------|--------|---|----|---|-----------|--------|----|----|
| 794.5703 | 794.5705 | 0.0002 | d | 40 | 4 | PE(40:4)  | [M-H]- | <1 | 1  |
| 750.5432 | 750.5443 | 0.0011 | e | 38 | 5 | PE(e38:5) | [M-H]- | <1 | <1 |
| 766.5389 | 766.5392 | 0.0003 | d | 38 | 4 | PE(38:4)  | [M-H]- | <1 | 1  |
| 772.5862 | 772.5862 | 0.0030 | d | 38 | 1 | PE(38:1)  | [M-H]- | <1 | <1 |
| 702.5434 | 702.5443 | 0.0009 | e | 34 | 1 | PE(e34:1) | [M-H]- | <1 | <1 |
| 686.4753 | 686.4766 | 0.0013 | d | 32 | 2 | PE(32:2)  | [M-H]- | <1 | <1 |
| 674.5128 | 674.5130 | 0.0002 | e | 32 | 0 | PE(e32:1) | [M-H]- | <1 | <1 |
| 712.4912 | 712.4923 | 0.0011 | d | 34 | 3 | PE(34:3)  | [M-H]- | <1 | <1 |
| 798.6008 | 798.6018 | 0.0010 | d | 40 | 2 | PE(40:2)  | [M-H]- | <1 | <1 |

Table S3: PI, negative ionisation mode

| Input<br>Mass | Matched<br>Mass | $\Delta$ | type* | C  | DB | Species                   | Ion    | %<br>Flagella | %<br>Whole cells |
|---------------|-----------------|----------|-------|----|----|---------------------------|--------|---------------|------------------|
| 861.5489      | 861.5498        | 0.0009   | d     | 36 | 2  | PI(18:0/18:2);(18:1/18:1) | [M-H]- | 100           | 100              |
| 863.5651      | 863.5655        | 0.0004   | d     | 36 | 1  | PI(18:0/18:1)             | [M-H]- | 91            | 67               |
| 909.5490      | 909.5498        | 0.0008   | d     | 40 | 6  | PI(18:0/22:6)             | [M-H]- | 28            | 29               |
| 859.5335      | 859.5342        | 0.0007   | d     | 36 | 3  | PI(18:2/18:1)             | [M-H]- | 18            | 21               |
| 911.5652      | 911.5655        | 0.0003   | d     | 40 | 5  | PI(18:0/22:5)             | [M-H]- | 13            | 11               |
| 835.5340      | 835.5342        | 0.0002   | d     | 34 | 1  | PI(16:0/18:1)             | [M-H]- | 11            | 11               |
| 833.5178      | 833.5185        | 0.0007   | d     | 34 | 2  | PI(16:0/18:2)             | [M-H]- | 10            | 14               |
| 847.5703      | 847.5706        | 0.0003   | e     | 36 | 2  | PI(O-18:0/18:2)           | [M-H]- | 9             | 6                |
| 907.5340      | 907.5342        | 0.0002   | d     | 40 | 7  | PI(18:1/22:6)             | [M-H]- | 7             | 7                |
| 847.5328      | 847.5342        | 0.0014   | d     | 35 | 2  | PI(35:2)                  | [M-H]- | 7             | 8                |
| 885.5487      | 885.5498        | 0.0011   | d     | 38 | 4  | PI(18:0/20:4)             | [M-H]- | 5             | 5                |
| 887.5649      | 887.5655        | 0.0006   | d     | 38 | 3  | PI(38:3)                  | [M-H]- | 4             | 3                |
| 857.5178      | 857.5185        | 0.0007   | d     | 36 | 4  | PI(18:2/18:2)             | [M-H]- | 4             | 4                |
| 905.5178      | 905.5185        | 0.0007   | d     | 40 | 8  | PI(18:2/22:6)             | [M-H]- | 4             | 4                |
| 913.5807      | 913.5811        | 0.0004   | d     | 40 | 4  | PI(40:4)                  | [M-H]- | 3             | 3                |
| 889.5803      | 889.5811        | 0.0008   | d     | 38 | 2  | PI(38:2)                  | [M-H]- | 3             | 3                |
| 915.5961      | 915.5968        | 0.0007   | d     | 40 | 3  | PI(40:3)                  | [M-H]- | 3             | 3                |
| 883.5341      | 883.5342        | 0.0001   | d     | 38 | 5  | PI(38:5)                  | [M-H]- | 2             | 3                |
| 881.5180      | 881.5185        | 0.0005   | d     | 38 | 6  | PI(38:6)                  | [M-H]- | 2             | 3                |
| 849.5857      | 849.5862        | 0.0005   | e     | 36 | 1  | PI(e36:1)                 | [M-H]- | 1             | 1                |
| 831.5024      | 831.5029        | 0.0005   | d     | 34 | 3  | PI(34:3)                  | [M-H]- | 1             | 2                |
| 805.4861      | 805.4872        | 0.0011   | d     | 32 | 2  | PI(32:2)                  | [M-H]- | 1             | <1               |
| 931.5333      | 931.5342        | 0.0009   | d     | 42 | 9  | PI(42:9)                  | [M-H]- | <1            | 1                |
| 845.5181      | 845.5185        | 0.0004   | d     | 35 | 3  | PI(35:3)                  | [M-H]- | <1            | 1                |
| 933.5483      | 933.5498        | 0.0015   | d     | 42 | 8  | PI(42:8)                  | [M-H]- | <1            | 1                |
| 845.5553      | 845.5549        | 0.0004   | e     | 36 | 3  | PI(e36:3)                 | [M-H]- | <1            | 1                |
| 953.5184      | 953.5185        | 0.0001   | d     | 44 | 12 | PI(44:12)                 | [M-H]- | <1            | 1                |
| 955.5338      | 955.5340        | 0.0002   | d     | 44 | 11 | PI(44:11)                 | [M-H]- | <1            | 1                |
| 935.5645      | 935.5655        | 0.0010   | d     | 42 | 7  | PI(42:7)                  | [M-H]- | <1            | <1               |
| 807.5025      | 807.5029        | 0.0004   | d     | 32 | 1  | PI(32:1)                  | [M-H]- | <1            | 1                |
| 809.5176      | 809.5185        | 0.0009   | d     | 32 | 0  | PI(32:0)                  | [M-H]- | <1            | <1               |
| 929.5195      | 929.5186        | 0.0009   | d     | 42 | 10 | PI(42:10)                 | [M-H]- | <1            | 1                |
| 959.5646      | 959.5654        | 0.0008   | d     | 44 | 9  | PI(44:9)                  | [M-H]- | <1            | <1               |
| 937.5802      | 937.5811        | 0.0009   | d     | 42 | 6  | PI(42:6)                  | [M-H]- | <1            | <1               |
| 957.5491      | 957.5498        | 0.0007   | d     | 44 | 10 | PI(44:10)                 | [M-H]- | <1            | <1               |
| 879.5026      | 879.5029        | 0.0003   | d     | 38 | 7  | PI(38:7)                  | [M-H]- | <1            | <1               |
| 829.4867      | 829.4872        | 0.0005   | d     | 34 | 4  | PI(34:4)                  | [M-H]- | <1            | <1               |
| 917.6112      | 917.6124        | 0.0012   | d     | 40 | 2  | PI(40:2)                  | [M-H]- | <1            | <1               |

Table S4: PS, positive ionisation mode

| Input<br>Mass | Matched<br>Mass | $\Delta$ | type* | C  | DB | Species         | Ion                | %<br>Flagella | %<br>Whole cells |
|---------------|-----------------|----------|-------|----|----|-----------------|--------------------|---------------|------------------|
| 774.5649      | 774.5644        | 0.0005   | e     | 36 | 2  | PS(e36:2)       | [M+H] <sup>+</sup> | 100           | 100              |
| 776.5811      | 776.5800        | 0.0011   | e     | 36 | 1  | PS(e36:1)       | [M+H] <sup>+</sup> | 35            | 35               |
| 802.5960      | 802.5957        | 0.0003   | e     | 38 | 2  | PS(e38:2)       | [M+H] <sup>+</sup> | 23            | 27               |
| 772.5486      | 772.5487        | 0.0001   | e     | 36 | 3  | PS(e36:3)       | [M+H] <sup>+</sup> | 11            | 11               |
| 804.6114      | 804.6113        | 0.0001   | e     | 38 | 1  | PS(e38:1)       | [M+H] <sup>+</sup> | 8             | 9                |
| 824.5802      | 824.5801        | 0.0001   | e     | 40 | 5  | PS(e40:5)       | [M+H] <sup>+</sup> | 6             | 2                |
| 822.5645      | 822.5644        | 0.0001   | e     | 40 | 6  | PS(e40:6)       | [M+H] <sup>+</sup> | 3             | 4                |
| 826.5966      | 826.5957        | 0.0009   | e     | 40 | 4  | PS(e40:4)       | [M+H] <sup>+</sup> | 3             | 1                |
| 792.5753      | 792.5749        | 0.0004   | d     | 36 | 0  | PS(36:0)        | [M+H] <sup>+</sup> | 2             | 11               |
| 778.5963      | 778.5957        | 0.0006   | e     | 36 | 0  | PS(e36:0)       | [M+H] <sup>+</sup> | 2             | 4                |
| 838.5602      | 838.5593        | 0.0009   | d     | 40 | 5  | PS(40:5)        | [M+H] <sup>+</sup> | 2             | 4                |
| 852.6126      | 852.6114        | 0.0012   | e     | 42 | 5  | PS(e42:5)       | [M+H] <sup>+</sup> | 1             | 3                |
| 840.5755      | 840.5749        | 0.0006   | d     | 40 | 4  | PS(40:4)        | [M+H] <sup>+</sup> | 1             | 4                |
| 828.6120      | 828.6113        | 0.0007   | e     | 40 | 3  | PS(e40:3)       | [M+H] <sup>+</sup> | 1             | 1                |
| 848.5806      | 848.5800        | 0.0006   | e     | 42 | 7  | PS(P-20:0/22:6) | [M+H] <sup>+</sup> | 1             | 8                |
| 760.5492      | 760.5487        | 0.0005   | e     | 35 | 2  | PS(e35:2)       | [M+H] <sup>+</sup> | 1             | <1               |
| 850.5968      | 850.5957        | 0.0011   | e     | 42 | 6  | PS(e42:6)       | [M+H] <sup>+</sup> | 1             | 6                |
| 762.5274      | 762.5280        | 0.0006   | d     | 34 | 1  | PS(34:1)        | [M+H] <sup>+</sup> | 1             | 1                |
| 864.5752      | 864.5750        | 0.0002   | d     | 42 | 6  | PS(42:6)        | [M+H] <sup>+</sup> | 1             | 6                |
| 842.5911      | 842.5906        | 0.0005   | d     | 40 | 3  | PS(40:3)        | [M+H] <sup>+</sup> | <1            | 2                |
| 866.5917      | 866.5906        | 0.0011   | d     | 42 | 5  | PS(42:5)        | [M+H] <sup>+</sup> | <1            | 2                |
| 836.5439      | 836.5437        | 0.0002   | d     | 40 | 6  | PS(40:6)        | [M+H] <sup>+</sup> | <1            | 1                |
| 862.5596      | 862.5593        | 0.0003   | d     | 42 | 7  | PS(42:7)        | [M+H] <sup>+</sup> | <1            | 6                |
| 814.5597      | 814.5593        | 0.0004   | d     | 38 | 3  | PS(38:3)        | [M+H] <sup>+</sup> | <1            | 3                |
| 762.5638      | 762.5644        | 0.0006   | e     | 35 | 1  | PS(e35:1)       | [M+H] <sup>+</sup> | <1            | <1               |

## PS, negative ionisation mode

| Input<br>Mass | Matched<br>Mass | $\Delta$ | type* | C  | DB | Species         | Ion                | %<br>Flagella | %<br>Whole cells |
|---------------|-----------------|----------|-------|----|----|-----------------|--------------------|---------------|------------------|
| 772.5481      | 772.5498        | 0.0017   | e     | 36 | 2  | PS(P-18:0/18:1) | [M-H] <sup>-</sup> | 100           | 100              |
| 798.5651      | 798.5654        | 0.0003   | e     | 38 | 3  | PS(e38:3)       | [M-H] <sup>-</sup> | 54            | 32               |
| 774.5655      | 774.5654        | 0.0001   | e     | 36 | 1  | PS(P-18:0/18:0) | [M-H] <sup>-</sup> | 49            | 40               |
| 800.5811      | 800.5811        | 0.0000   | e     | 38 | 2  | PS(e38:2)       | [M-H] <sup>-</sup> | 46            | 33               |
| 770.5334      | 770.5341        | 0.0007   | e     | 36 | 3  | PS(e36:3)       | [M-H] <sup>-</sup> | 16            | 18               |
| 788.5443      | 788.5447        | 0.0004   | d     | 36 | 1  | PS(36:1)        | [M-H] <sup>-</sup> | 13            | 12               |
| 802.5962      | 802.5967        | 0.0005   | e     | 38 | 1  | PS(e38:1)       | [M-H] <sup>-</sup> | 12            | 17               |



|          |          |        |   |    |   |           |        |    |    |
|----------|----------|--------|---|----|---|-----------|--------|----|----|
| 786.5286 | 786.5290 | 0.0004 | d | 36 | 2 | PS(36:2)  | [M-H]- | 10 | 11 |
| 834.5284 | 834.5290 | 0.0006 | d | 40 | 6 | PS(40:6)  | [M-H]- | 6  | 7  |
| 812.5440 | 812.5447 | 0.0007 | d | 38 | 3 | PS(38:3)  | [M-H]- | 6  | 5  |
| 842.5913 | 842.5916 | 0.0003 | d | 40 | 2 | PS(40:2)  | [M-H]- | 5  | 9  |
| 816.5756 | 816.5760 | 0.0004 | d | 38 | 1 | PS(38:1)  | [M-H]- | 4  | 12 |
| 830.6275 | 830.6280 | 0.0005 | e | 40 | 1 | PS(e40:1) | [M-H]- | 4  | 7  |
| 814.5602 | 814.5603 | 0.0001 | d | 38 | 2 | PS(38:2)  | [M-H]- | 4  | 8  |
| 836.5446 | 836.5447 | 0.0001 | d | 40 | 5 | PS(40:5)  | [M-H]- | 4  | 4  |
| 840.5757 | 840.5760 | 0.0003 | d | 40 | 3 | PS(40:3)  | [M-H]- | 3  | 5  |
| 828.6114 | 828.6124 | 0.0010 | e | 40 | 2 | PS(e40:2) | [M-H]- | 2  | 3  |
| 758.5330 | 758.5341 | 0.0011 | e | 35 | 2 | PS(e35:2) | [M-H]- | 2  | 2  |
| 796.5473 | 796.5498 | 0.0025 | e | 38 | 4 | PS(e38:4) | [M-H]- | 2  | 12 |
| 810.5281 | 810.5290 | 0.0009 | d | 38 | 4 | PS(38:4)  | [M-H]- | 2  | 2  |
| 826.5965 | 826.5967 | 0.0002 | e | 40 | 3 | PS(e40:3) | [M-H]- | 2  | 1  |
| 838.5600 | 838.5603 | 0.0003 | d | 40 | 4 | PS(40:4)  | [M-H]- | 2  | 2  |
| 864.5758 | 864.5760 | 0.0002 | d | 42 | 5 | PS(42:5)  | [M-H]- | 2  | 7  |
| 866.5915 | 866.5916 | 0.0001 | d | 42 | 4 | PS(42:4)  | [M-H]- | 1  | 6  |
| 818.5911 | 818.5917 | 0.0006 | d | 38 | 0 | PS(38:0)  | [M-H]- | 1  | 4  |
| 756.5181 | 756.5185 | 0.0004 | e | 35 | 3 | PS(e35:3) | [M-H]- | 1  | 2  |
| 868.6070 | 868.6073 | 0.0003 | d | 42 | 3 | PS(42:3)  | [M-H]- | 1  | 4  |
| 890.5904 | 890.5916 | 0.0012 | d | 44 | 6 | PS(44:6)  | [M-H]- | 1  | 3  |
| 860.5443 | 860.5447 | 0.0004 | d | 42 | 7 | PS(42:7)  | [M-H]- | 1  | 3  |
| 824.5805 | 824.5811 | 0.0006 | e | 40 | 4 | PS(e40:4) | [M-H]- | 1  | <1 |
| 870.6216 | 870.6229 | 0.0013 | d | 42 | 2 | PS(42:2)  | [M-H]- | 1  | 2  |
| 892.6064 | 892.6073 | 0.0009 | d | 44 | 5 | PS(44:5)  | [M-H]- | 1  | 2  |
| 784.5127 | 784.5134 | 0.0007 | d | 36 | 3 | PS(36:3)  | [M-H]- | <1 | <1 |
| 872.6382 | 872.6386 | 0.0004 | d | 42 | 1 | PS(42:1)  | [M-H]- | <1 | 1  |
| 818.5337 | 818.5341 | 0.0004 | e | 40 | 7 | PS(e40:7) | [M-H]- | <1 | 1  |
| 888.5753 | 888.5760 | 0.0007 | d | 44 | 7 | PS(44:7)  | [M-H]- | <1 | 1  |
| 804.6129 | 804.6123 | 0.0006 | e | 38 | 0 | PS(e38:0) | [M-H]- | <1 | 1  |
| 790.5596 | 790.5603 | 0.0007 | d | 36 | 0 | PS(36:0)  | [M-H]- | <1 | 1  |
| 894.6224 | 894.6229 | 0.0005 | d | 44 | 4 | PS(44:4)  | [M-H]- | <1 | 1  |
| 742.5021 | 742.5028 | 0.0007 | e | 34 | 3 | PS(34:3)  | [M-H]- | <1 | 1  |
| 808.5113 | 808.5123 | 0.0010 | d | 38 | 5 | PS(38:5)  | [M-H]- | <1 | <1 |
| 832.5134 | 832.5134 | 0.0000 | d | 40 | 7 | PS(40:7)  | [M-H]- | <1 | <1 |
| 822.5629 | 822.5654 | 0.0025 | e | 40 | 5 | PS(e40:5) | [M-H]- | <1 | <1 |
| 766.5026 | 766.5028 | 0.0002 | e | 36 | 5 | PS(e36:5) | [M-H]- | <1 | 2  |
| 744.5174 | 744.5185 | 0.0011 | e | 34 | 2 | PS(e34:2) | [M-H]- | <1 | <1 |
| 740.4878 | 740.4872 | 0.0006 | e | 34 | 4 | PS(e34:4) | [M-H]- | <1 | <1 |
| 790.5027 | 790.5028 | 0.0001 | e | 38 | 7 | PS(e38:7) | [M-H]- | <1 | <1 |

Table S5: PG, negative ionisation mode

| Input<br>Mass | Matched<br>Mass | $\Delta$ | type* | C  | DB | Species                   | Ion    | %<br>Flagella | %<br>Whole cells |
|---------------|-----------------|----------|-------|----|----|---------------------------|--------|---------------|------------------|
| 773.5330      | 773.5338        | 0.0008   | d     | 36 | 2  | PG(18:0/18:2)             | [M-H]- | 100           | 100              |
| 759.5540      | 759.5545        | 0.0005   | e     | 36 | 2  | PG(O-18:0/18:2)           | [M-H]- | 77            | 59               |
| 775.5494      | 775.5494        | 0.0000   | d     | 36 | 1  | PG(18:0/18:1)             | [M-H]- | 43            | 35               |
| 757.5379      | 757.5378        | 0.0001   | e     | 36 | 3  | PG(e36:3)                 | [M-H]- | 33            | 11               |
| 821.5329      | 821.5338        | 0.0009   | d     | 40 | 6  | PG(18:0/22:6)             | [M-H]- | 26            | 25               |
| 771.5179      | 771.5181        | 0.0002   | d     | 36 | 3  | PG(18:1/18:2)             | [M-H]- | 16            | 21               |
| 823.5488      | 823.5494        | 0.0006   | d     | 40 | 5  | PG(40:5)                  | [M-H]- | 11            | 12               |
| 817.5020      | 817.5025        | 0.0005   | d     | 40 | 8  | PG(18:2/22:6)             | [M-H]- | 9             | 10               |
| 769.5022      | 769.5025        | 0.0003   | d     | 36 | 4  | PG(18:2/18:2)             | [M-H]- | 8             | 11               |
| 819.5179      | 819.5181        | 0.0002   | d     | 40 | 7  | PG(18:1/22:6);(18:2/22:5) | [M-H]- | 9             | 11               |
| 865.5016      | 865.5025        | 0.0009   | d     | 44 | 12 | PG(44:12)                 | [M-H]- | 4             | 6                |
| 747.5177      | 747.5181        | 0.0004   | d     | 34 | 1  | PG(34:1)                  | [M-H]- | 3             | 3                |
| 867.5175      | 867.5182        | 0.0007   | d     | 44 | 10 | PG(44:10)                 | [M-H]- | 2             | 4                |
| 745.5022      | 745.5025        | 0.0003   | d     | 34 | 2  | PG(34:2)                  | [M-H]- | 4             | 6                |
| 841.5017      | 841.5025        | 0.0008   | d     | 42 | 10 | PG(42:10)                 | [M-H]- | 1             | 1                |
| 843.5176      | 843.5181        | 0.0005   | d     | 42 | 9  | PG(42:9)                  | [M-H]- | 1             | 1                |
| 743.4859      | 743.4868        | 0.0009   | d     | 34 | 3  | PG(34:3)                  | [M-H]- | <1            | 1                |
| 869.5330      | 869.5338        | 0.0008   | d     | 44 | 10 | PG(44:10)                 | [M-H]- | <1            | 1                |

Table S6: SM, positive ionisation mode

| <b>Input<br/>Mass</b> | <b>Matched<br/>Mass</b> | $\Delta$ | <b>C</b> | <b>DB</b> | <b>Species</b> | <b>Ion</b>         | <b>%<br/>Flagella</b> | <b>%<br/>Whole cells</b> |
|-----------------------|-------------------------|----------|----------|-----------|----------------|--------------------|-----------------------|--------------------------|
| 675.5440              | 675.5435                | 0.0005   | 32       | 1         | SM(d32:1)      | [M+H] <sup>+</sup> | 100                   | 100                      |
| 703.5750              | 703.5749                | 0.0001   | 34       | 1         | SM(d34:1)      | [M+H] <sup>+</sup> | 96                    | 99                       |
| 717.5907              | 717.5905                | 0.0002   | 35       | 1         | SM(d35:1)      | [M+H] <sup>+</sup> | 29                    | 20                       |
| 731.6064              | 731.6062                | 0.0002   | 36       | 1         | SM(d36:1)      | [M+H] <sup>+</sup> | 34                    | 19                       |
| 705.5909              | 705.5905                | 0.0004   | 34       | 0         | SM(d34:0)      | [M+H] <sup>+</sup> | 34                    | 19                       |
| 677.5597              | 677.5562                | 0.0035   | 32       | 0         | SM(d32:0)      | [M+H] <sup>+</sup> | 25                    | 15                       |
| 689.5596              | 689.5592                | 0.0004   | 33       | 1         | SM(d33:1)      | [M+H] <sup>+</sup> | 16                    | 11                       |
| 719.6068              | 719.6061                | 0.0007   | 35       | 0         | SM(d35:0)      | [M+H] <sup>+</sup> | 13                    | 6                        |
| 733.6223              | 733.6218                | 0.0005   | 36       | 0         | SM(d36:0)      | [M+H] <sup>+</sup> | 11                    | 5                        |
| 701.5596              | 701.5592                | 0.0004   | 34       | 2         | SM(d34:2)      | [M+H] <sup>+</sup> | 5                     | 5                        |
| 729.5906              | 729.5905                | 0.0001   | 36       | 2         | SM(d36:2)      | [M+H] <sup>+</sup> | 3                     | 3                        |

## SM, negative ionisation mode

| <b>Input<br/>Mass</b> | <b>Matched<br/>Mass</b> | $\Delta$ | <b>C</b> | <b>DB</b> | <b>Species</b> | <b>Ion</b>               | <b>%<br/>Flagella</b> | <b>%<br/>Whole cells</b> |
|-----------------------|-------------------------|----------|----------|-----------|----------------|--------------------------|-----------------------|--------------------------|
| 747.5655              | 747.5653                | 0.0002   | 34       | 1         | SM(d34:1)      | [M+Formate] <sup>-</sup> | 100                   | 100                      |
| 719.5336              | 719.5340                | 0.0004   | 32       | 1         | SM(d32:1)      | [M+Formate] <sup>-</sup> | 86                    | 94                       |
| 749.5813              | 749.5810                | 0.0003   | 34       | 0         | SM(d34:0)      | [M+Formate] <sup>-</sup> | 25                    | 22                       |
| 761.5809              | 761.5810                | 0.0001   | 35       | 1         | SM(d35:1)      | [M+Formate] <sup>-</sup> | 18                    | 20                       |
| 775.5966              | 775.5966                | 0.0000   | 36       | 1         | SM(d36:1)      | [M+Formate] <sup>-</sup> | 14                    | 14                       |

Table S7: IPC, positive ionisation mode

| <b>Input<br/>Mass</b> | <b>Matched<br/>Mass</b> | $\Delta$ | <b>C</b> | <b>DB</b> | <b>Species</b> | <b>Ion</b>         | <b>%<br/>Flagella</b> | <b>%<br/>Whole cells</b> |
|-----------------------|-------------------------|----------|----------|-----------|----------------|--------------------|-----------------------|--------------------------|
| 780.5392              | 780.5385                | 0.0007   | 34       | 1         | IPC(34:1)      | [M+H] <sup>+</sup> | 100                   | 100                      |
| 752.5075              | 752.5072                | 0.0003   | 32       | 1         | IPC(32:1)      | [M+H] <sup>+</sup> | 59                    | 34                       |
| 794.5547              | 794.5542                | 0.0005   | 35       | 1         | IPC(35:1)      | [M+H] <sup>+</sup> | 20                    | 23                       |
| 782.5564              | 782.5542                | 0.0022   | 34       | 0         | IPC(34:0)      | [M+H] <sup>+</sup> | 21                    | 17                       |
| 754.5243              | 754.5229                | 0.0014   | 32       | 0         | IPC(32:0)      | [M+H] <sup>+</sup> | 17                    | 10                       |
| 766.5230              | 766.5229                | 0.0001   | 33       | 1         | IPC(33:1)      | [M+H] <sup>+</sup> | 6                     | 9                        |

## IPC, negative ionisation mode

| <b>Input<br/>Mass</b> | <b>Matched<br/>Mass</b> | $\Delta$ | <b>C</b> | <b>DB</b> | <b>Species</b> | <b>Ion</b>         | <b>%<br/>Flagella</b> | <b>%<br/>Whole cells</b> |
|-----------------------|-------------------------|----------|----------|-----------|----------------|--------------------|-----------------------|--------------------------|
| 778.5234              | 778.5240                | 0.0006   | 34       | 1         | IPC(34:1)      | [M-H] <sup>-</sup> | 100                   | 100                      |
| 750.4922              | 750.4921                | 0.0001   | 32       | 1         | IPC(32:1)      | [M-H] <sup>-</sup> | 68                    | 50                       |
| 752.5086              | 752.5099                | 0.0013   | 32       | 0         | IPC(32:0)      | [M-H] <sup>-</sup> | 25                    | 19                       |
| 792.5388              | 792.5396                | 0.0008   | 35       | 0         | IPC(35:1)      | [M-H] <sup>-</sup> | 19                    | 24                       |
| 796.5340              | 796.5345                | 0.0005   | 34       | 0         | IPC(t34:0)     | [M-H] <sup>-</sup> | 17                    | 2                        |
| 780.5389              | 780.5396                | 0.0007   | 34       | 0         | IPC(34:0)      | [M-H] <sup>-</sup> | 15                    | 15                       |
| 764.5077              | 764.5083                | 0.0006   | 35       | 1         | IPC(35:1)      | [M-H] <sup>-</sup> | 14                    | 11                       |
| 806.5543              | 806.5547                | 0.0004   | 36       | 1         | IPC(36:1)      | [M-H] <sup>-</sup> | 13                    | 16                       |
| 794.5545              | 794.5553                | 0.0008   | 35       | 1         | IPC(35:0)      | [M-H] <sup>-</sup> | 6                     | 6                        |
| 776.5071              | 776.5083                | 0.0012   | 34       | 2         | IPC(34:2)      | [M-H] <sup>-</sup> | 5                     | 5                        |
| 808.5725              | 808.5705                | 0.0020   | 36       | 0         | IPC(36:0)      | [M-H] <sup>-</sup> | 4                     | 3                        |
| 766.5236              | 766.5240                | 0.0004   | 33       | 0         | IPC(33:0)      | [M-H] <sup>-</sup> | 4                     | 3                        |

**Table S8:** Ceramide, positive ionisation mode

| <b>Input<br/>Mass</b> | <b>Matched<br/>Mass</b> | $\Delta$ | <b>C</b> | <b>DB</b> | <b>Species</b> | <b>Ion</b>         | <b>%<br/>Flagella</b> | <b>%<br/>Whole cells</b> |
|-----------------------|-------------------------|----------|----------|-----------|----------------|--------------------|-----------------------|--------------------------|
| 510.4885              | 510.4881                | 0.0004   | 32       | 1         | Cer(d32:1)     | [M+H] <sup>+</sup> | 100                   | 100                      |
| 538.5196              | 538.5194                | 0.0002   | 34       | 1         | Cer(d34:1)     | [M+H] <sup>+</sup> | 96                    | 90                       |
| 566.5510              | 566.5507                | 0.0003   | 18       | 1         | Cer(d36:1)     | [M+H] <sup>+</sup> | 79                    | 35                       |
| 568.5666              | 568.5663                | 0.0003   | 36       | 0         | Cer(d36:0)     | [M+H] <sup>+</sup> | 51                    | 18                       |
| 540.5352              | 540.5350                | 0.0002   | 34       | 0         | Cer(d34:0)     | [M+H] <sup>+</sup> | 45                    | 18                       |
| 512.5040              | 512.5037                | 0.0003   | 32       | 0         | Cer(d32:0)     | [M+H] <sup>+</sup> | 45                    | 33                       |
| 300.2904              | 300.2897                | 0.0007   | 18       | 1         | Cer(d18:1)     | [M+H] <sup>+</sup> | 43                    | 21                       |
